# Supplementary material for: Bacterial Succession during Vermicomposting of Silver Wattle (Acacia dealbata Link)
Source: MDPI journal article supplement (doi:10.3390/microorganisms10010065), 2021-12-29
Supplement: s1 [file s1]

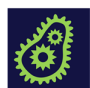

## Supplementary Materials

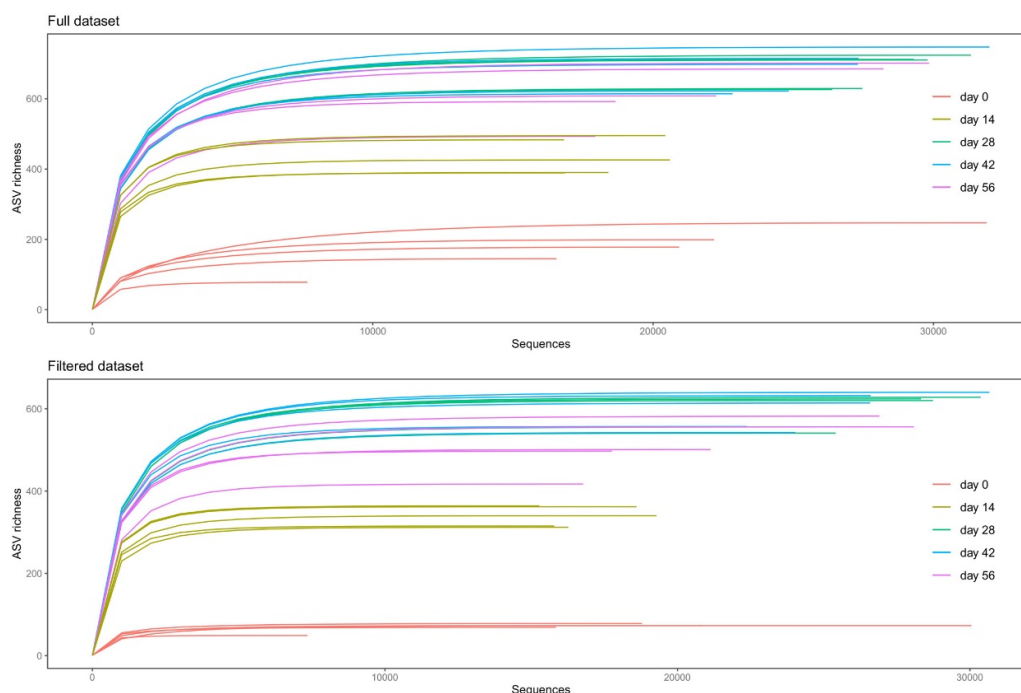

**Figure S1.** Rarefaction curves of the full and filtered dataset indicating the number of amplicon sequence variants (ASVs) found in each sample during vermicomposting of the silver wattle.

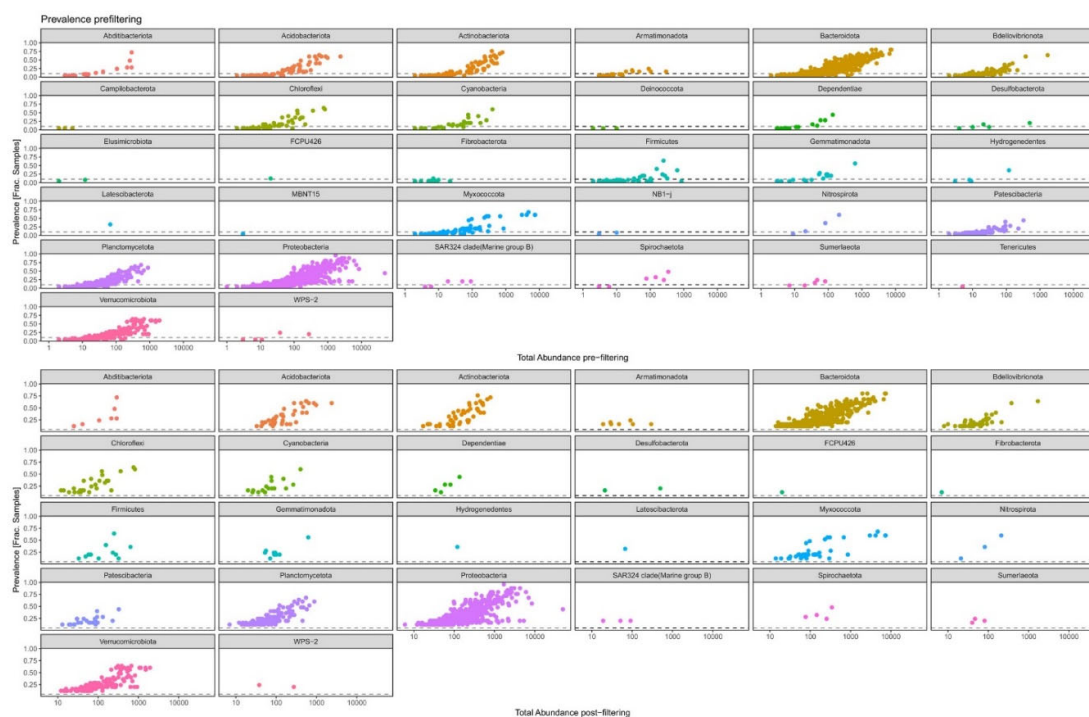

**Figure S2.** Taxa prevalence versus total counts before and after doing a prevalence filtering using ten percent of all samples as the prevalence threshold. Each point is a different bacterial ASV.

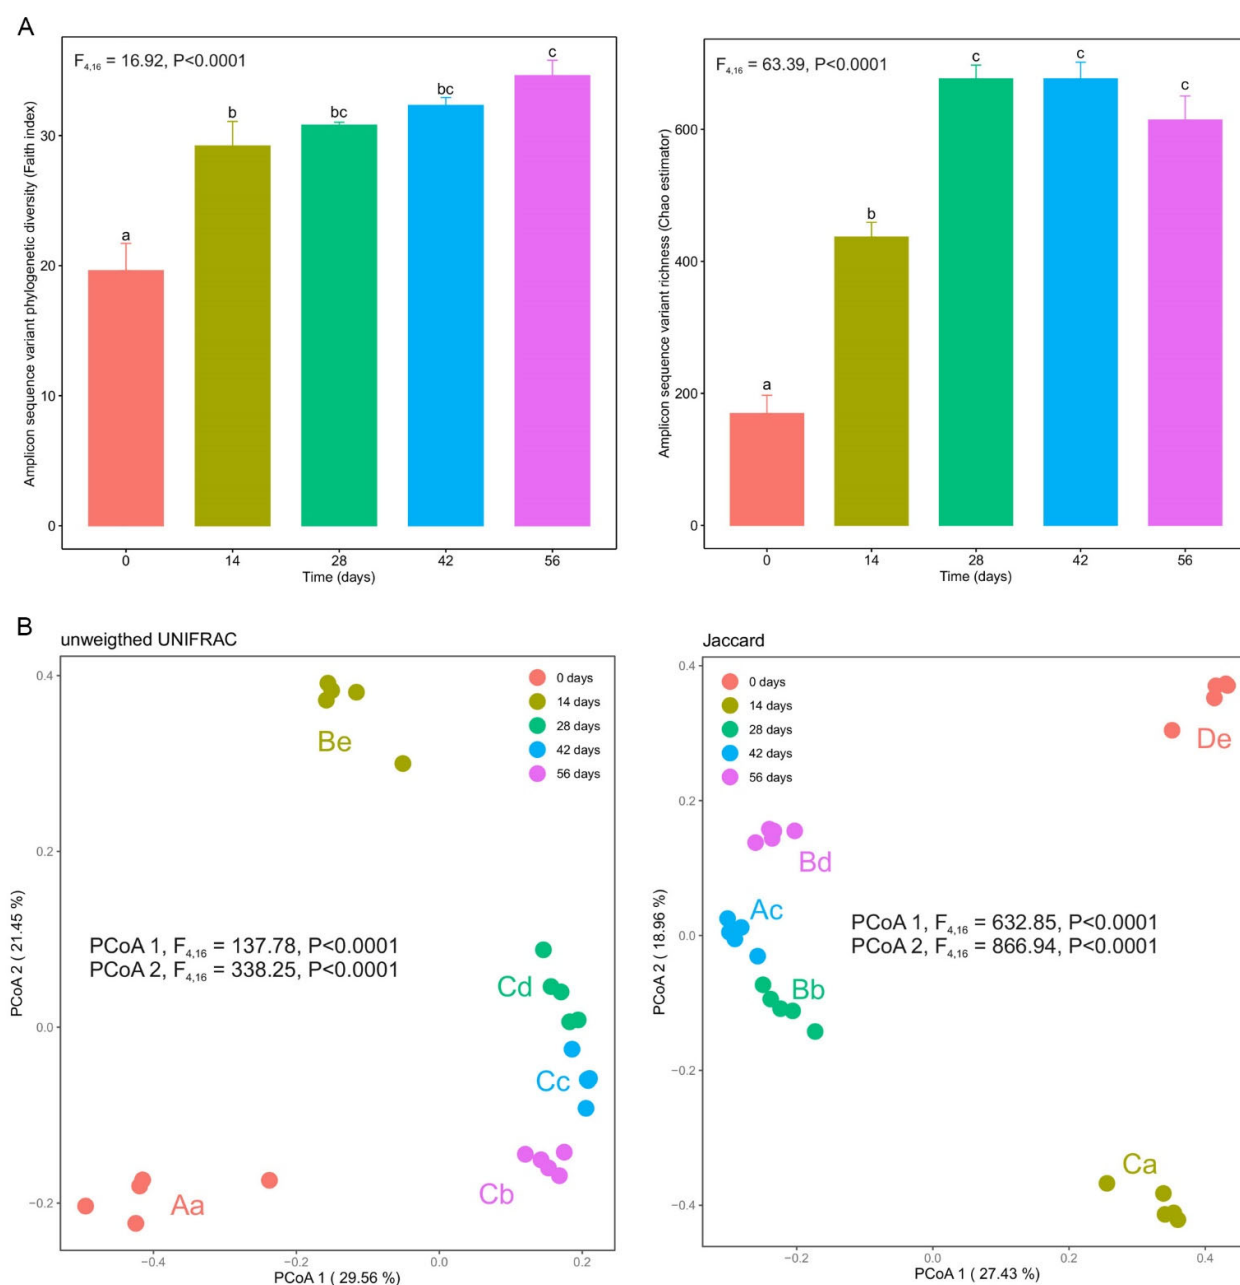

**Figure S3.** Change in bacterial  $\alpha$ - and  $\beta$ -diversity during vermicomposting of the silver wattle. **(A)**  $\alpha$ -Diversity is shown in terms of richness (Chao1 estimator) and phylogenetic diversity (Faith's PD index). Letters indicate significant differences between time points (Tukey HSD test). **(B)**  $\beta$ -diversity is shown by principal coordinate analysis (PCoA) of unweighted UniFrac and Jaccard distances. Capital and lower case letters indicate significant differences between the time points in PCoA1 and PCoA2 scores, respectively (Tukey HSD test, FDR corrected).

**Table S1.** Differential abundance in bacterial taxa during vermicomposting of silver wattle (*Acacia dealbata*) analyzed using negative binomial models as implemented in the package DESeq2.

| base log2Fold | Mea     | dChan  | lfcSE  | stat     | pvalue   | padj  | Phylum            | Class               | Order              | Family             | Genus           | ASV    | Comparison       |
|---------------|---------|--------|--------|----------|----------|-------|-------------------|---------------------|--------------------|--------------------|-----------------|--------|------------------|
| n             | ge      |        |        |          |          |       |                   |                     |                    |                    |                 |        |                  |
| 11.66         | 22.3775 | 4.6528 | 4.8093 | 1.51E-06 | 0.0002   | 59565 | Bacteroidia       | Bacteroidia         | Flavobacteriales   | Crocini-tomicaceae | unclassified    | ASV304 | day 0 vs. day 14 |
| 22.63         | 21.5315 | 3.2682 | 6.5881 | 4.45E-11 | 6.01E-08 |       | Verrucomicrobiota | Verrucomicrobiae    | Verrucomicrobiales | Rubritaleaceae     | Luteolibacter   | ASV159 | day 0 vs. day 14 |
| 5.020         | 21.4748 | 4.6536 | 4.6146 | 3.94E-06 | 0.0005   | 53346 | Bacteroidia       | Bacteroidia         | Flavobacteriales   | Flavobacteriaceae  | Flavobacterium  | ASV605 | day 0 vs. day 14 |
| 4.268         | 21.2681 | 4.6538 | 4.5700 | 4.88E-06 | 0.0006   | 26596 | Verrucomicrobiota | Verrucomicrobiae    | Verrucomicrobiales | Rubritaleaceae     | Luteolibacter   | ASV668 | day 0 vs. day 14 |
| 8.919         | 21.2594 | 4.5375 | 4.6852 | 2.80E-06 | 0.0004   | 23307 | Myxococcota       | Myxococcia          | Myxococcales       | Myxococcaceae      | Corallococcus   | ASV92  | day 0 vs. day 14 |
| 2.675         | 20.7312 | 4.6547 | 4.4538 | 8.44E-06 | 0.0010   | 07193 | Chloroflexi       | Chloroflexia        | Chloroflexales     | Chloroflexaceae    | FFCH7168        | ASV886 | day 0 vs. day 14 |
| 3.066         | 20.5907 | 4.6544 | 4.4239 | 9.69E-06 | 0.0011   | 43967 | Bacteroidia       | Bacteroidia         | Cytophagales       | Spirosomaceae      | Leadbetterella  | ASV803 | day 0 vs. day 14 |
| 2.404         | 20.5872 | 4.6549 | 4.4226 | 9.75E-06 | 0.0011   | 43967 | Proteobacteria    | Alphaproteobacteria | Sphingomonadales   | Sphingomonadaceae  | Novosphingobium | ASV956 | day 0 vs. day 14 |
| 26.88         | 18.9777 | 2.7584 | 6.8798 | 5.99E-12 | 1.16E-08 |       | Bacteroidia       | Bacteroidia         | Chitinophagales    | Chitinophagaceae   | Chitinophaga    | ASV198 | day 0 vs. day 14 |
| 239.3         | 10.9112 | 1.4488 | 7.5310 | 5.03E-14 | 1.36E-10 |       | Proteobacteria    | Gammaproteobacteria | Burkholderiales    | Comamonadaceae     | unclassified    | ASV9   | day 0 vs. day 14 |
| 57.81         | 10.1228 | 1.7984 | 5.6285 | 1.82E-08 | 6.81E-06 |       | Bacteroidia       | Bacteroidia         | Chitinophagales    | Chitinophagaceae   | Ferruginibacter | ASV60  | day 0 vs. day 14 |
| 88.18         | 10.0468 | 1.5911 | 6.3142 | 2.71E-10 | 2.82E-07 |       | Proteobacteria    | Alphaproteobacteria | Sphingomonadales   | Sphingomonadaceae  | Novosphingobium | ASV33  | day 0 vs. day 14 |
| 46.21         | 10.0259 | 2.4826 | 4.0384 | 5.38E-05 | 0.0046   | 24763 | Bacteroidia       | Bacteroidia         | Flavobacteriales   | Flavobacteriaceae  | Flavobacterium  | ASV72  | day 0 vs. day 14 |
| 82.05         | 9.7601  | 1.6333 | 5.9756 | 2.29E-09 | 1.63E-06 |       | Proteobacteria    | Gammaproteobacteria | Burkholderiales    | Comamonadaceae     | Hydrogenophaga  | ASV41  | day 0 vs. day 14 |
| 39.94         | 9.7091  | 1.2198 | 5.7488 | 9.51E-06 | 0.0001   | 8684  | Proteobacteria    | Alphaproteobacteria | Caulobacteriales   | Caulobacteraceae   | Asticcacaulis   | ASV81  | day 0 vs. day 14 |
| 45.13         | 9.6782  | 1.8230 | 5.3087 | 1.10E-07 | 3.10E-05 |       | Proteobacteria    | Alphaproteobacteria | Caulobacteriales   | Caulobacteraceae   | Brevundimonas   | ASV77  | day 0 vs. day 14 |
| 43.49         | 9.6610  | 1.9032 | 5.0760 | 3.85E-07 | 8.66E-05 |       | Bacteroidia       | Bacteroidia         | Cytophagales       | Spirosomaceae      | Persicitalea    | ASV78  | day 0 vs. day 14 |
| 33.38         | 9.5168  | 1.2307 | 5.4124 | 1.37E-05 | 0.0033   | 03089 | Bacteroidia       | Bacteroidia         | Chitinophagales    | Chitinophagaceae   | unclassified    | ASV96  | day 0 vs. day 14 |
| 157.09        | 4.9437  | 1.6098 | 5.8978 | 3.68E-09 | 2.16E-06 |       | Proteobacteria    | Alphaproteobacteria | Sphingomonadales   | Sphingomonadaceae  | Novosphingobium | ASV18  | day 0 vs. day 14 |

|        |         |        |        |          |          |                |                     |                    |                     |                     |                       |
|--------|---------|--------|--------|----------|----------|----------------|---------------------|--------------------|---------------------|---------------------|-----------------------|
| 67.89  | 9.31796 | 1.7635 | 5.2836 | 1.27E-3  | 3.49E-05 | Proteobacteria | Alphaproteobacteria | Caulobacteriales   | Hyphomonadaceae     | Hirschia            | ASV5 day 0 vs. day 14 |
| 49.83  | 9.29475 | 1.8535 | 5.0145 | 5.32E-07 | 0.0001   | Bacteroidia    | Bacteroidia         | Sphingobacteriales | Sphingobacteriaceae | Sphingobacterium    | ASV7 day 0 vs. day 14 |
| 57.79  | 9.26167 | 1.8347 | 5.0479 | 4.47E-07 | 9.47E-05 | Proteobacteria | Gammaproteobacteria | Xanthomonadales    | Xanthomonadaceae    | Stenotrophomonas    | ASV6 day 0 vs. day 14 |
| 26.98  | 9.17910 | 2.4971 | 3.6757 | 0.0002   | 0.0158   | Proteobacteria | Alphaproteobacteria | Sphingomonadales   | Sphingomonadaceae   | Novosphingobium     | ASV1 day 0 vs. day 14 |
| 24.50  | 9.13521 | 2.4826 | 3.6795 | 0.0002   | 0.0157   | Proteobacteria | Gammaproteobacteria | Burkholderiales    | Comamonadaceae      | Pseudorhododoferrax | ASV1 day 0 vs. day 14 |
| 78.76  | 9.03148 | 1.4457 | 6.2470 | 4.18E-07 | 3.76E-07 | Proteobacteria | Gammaproteobacteria | Xanthomonadales    | Rhodanobacteraceae  | Dokdonella          | ASV5 day 0 vs. day 14 |
| 91.11  | 8.92716 | 1.8915 | 4.7195 | 2.36E-06 | 0.0003   | Bacteroidia    | Bacteroidia         | Flavobacteriales   | Flavobacteriaceae   | Flavobacterium      | ASV4 day 0 vs. day 14 |
| 25.58  | 8.81445 | 2.1000 | 4.1972 | 2.70E-05 | 0.0025   | Bacteroidia    | Bacteroidia         | Flavobacteriales   | Crocinitomicaceae   | Fluviicola          | ASV1 day 0 vs. day 14 |
| 114.28 | 7.7368  | 1.4786 | 5.9337 | 2.96E-09 | 1.82E-06 | Bacteroidia    | Bacteroidia         | Cytophagales       | Microscillaceae     | Ohtaekwangia        | ASV3 day 0 vs. day 14 |
| 339.38 | 7.5185  | 1.4196 | 6.1649 | 7.05E-05 | 5.95E-07 | Bacteroidia    | Bacteroidia         | Flavobacteriales   | Flavobacteriaceae   | Flavobacterium      | ASV3 day 0 vs. day 14 |
| 35.54  | 8.71383 | 1.7435 | 4.9976 | 5.80E-07 | 0.0001   | Proteobacteria | Gammaproteobacteria | Xanthomonadales    | unclassified        | unclassified        | ASV1 day 0 vs. day 14 |
| 17.91  | 8.63768 | 2.1105 | 4.0926 | 4.26E-05 | 0.0037   | Bacteroidia    | Bacteroidia         | Chitinophagales    | Chitinophagaceae    | unclassified        | ASV1 day 0 vs. day 14 |
| 26.50  | 8.60735 | 1.8791 | 4.5803 | 4.64E-06 | 0.0006   | Proteobacteria | Gammaproteobacteria | Pseudomonadales    | Moraxellaceae       | Cavicella           | ASV1 day 0 vs. day 14 |
| 83.92  | 8.56931 | 1.4653 | 5.8479 | 4.98E-09 | 2.59E-06 | Bacteroidia    | Bacteroidia         | Cytophagales       | Microscillaceae     | unclassified        | ASV4 day 0 vs. day 14 |
| 84.81  | 8.54313 | 1.8450 | 4.6302 | 3.65E-06 | 0.0005   | Proteobacteria | Gammaproteobacteria | Burkholderiales    | Comamonadaceae      | unclassified        | ASV4 day 0 vs. day 14 |
| 66.78  | 8.44776 | 2.3683 | 3.5668 | 0.0003   | 0.0223   | Proteobacteria | Gammaproteobacteria | Burkholderiales    | Comamonadaceae      | Rhizobacter         | ASV6 day 0 vs. day 14 |
| 18.47  | 8.37801 | 2.2873 | 3.6627 | 0.0002   | 0.0165   | Proteobacteria | Gammaproteobacteria | Xanthomonadales    | Xanthomonadaceae    | Luteimonas          | ASV2 day 0 vs. day 14 |
| 26.56  | 8.33476 | 2.3769 | 3.5065 | 0.0004   | 0.0274   | Bacteroidia    | Bacteroidia         | Flavobacteriales   | Flavobacteriaceae   | Flavobacterium      | ASV1 day 0 vs. day 14 |
| 166.78 | 3.1994  | 1.9309 | 4.3087 | 1.64E-05 | 0.0017   | Bacteroidia    | Bacteroidia         | Flavobacteriales   | Flavobacteriaceae   | Flavobacterium      | ASV1 day 0 vs. day 14 |

|                                      |                     |                    |                     |                  |                       |
|--------------------------------------|---------------------|--------------------|---------------------|------------------|-----------------------|
| 30.948.199421.81364.52086.16E-0.0007 | Bacteroidia         | Sphingobacteriales | Sphingobacteriaceae | unclassified     | ASV1 day 0 vs. day 14 |
| 6 5926 74656 91273 06 69292          | Bacteroidia         | Bacteroidia        | Bacteroidia         | unclassified     | ASV1 day 0 vs. day 14 |
| 100.28.189981.41305.79596.79E-3.27E- | Proteobacteria      | Burkholderiales    | Alcaligenaceae      | Achromobacter    | ASV3 day 0 vs. day 14 |
| 45 9559 57772 3398 09 06             | Proteobacteria      | Burkholderiales    | Alcaligenaceae      | Achromobacter    | ASV3 day 0 vs. day 14 |
| 121.78.152071.91134.26502.00E-0.0020 | Bacteroidia         | Flavobacteriales   | Flavobacteriaceae   | Flavobacterium   | ASV2 day 0 vs. day 14 |
| 08 0906 72225 35768 05 12565         | Bacteroidia         | Flavobacteriales   | Flavobacteriaceae   | Flavobacterium   | ASV2 day 0 vs. day 14 |
| 20.848.119902.13043.81120.00010.0102 | Bacteroidia         | Sphingobacteriales | Sphingobacteriaceae | Pedobacter       | ASV2 day 0 vs. day 14 |
| 28 4397 98855 69074 38255 49114      | Bacteroidia         | Sphingobacteriales | Sphingobacteriaceae | Pedobacter       | ASV2 day 0 vs. day 14 |
| 16.358.068662.04553.94448.00E-0.0065 | Proteobacteria      | Oceanospirillales  | Pseudohongiellaceae | Pseudohongiella  | ASV2 day 0 vs. day 14 |
| 09 892 79015 42556 05 40417          | Proteobacteria      | Oceanospirillales  | Pseudohongiellaceae | Pseudohongiella  | ASV2 day 0 vs. day 14 |
| 18.078.058721.75234.59874.25E-0.0005 | Bacteroidia         | Chitinophagales    | Chitinophagaceae    | Niabella         | ASV2 day 0 vs. day 14 |
| 91 0291 79617 29756 06 85215         | Bacteroidia         | Chitinophagales    | Chitinophagaceae    | Niabella         | ASV2 day 0 vs. day 14 |
| 37.088.040881.45735.51733.44E-1.16E- | Proteobacteria      | Burkholderiales    | Methylophilaceae    | Methylophilus    | ASV1 day 0 vs. day 14 |
| 59 1135 87685 24743 08 05            | Proteobacteria      | Burkholderiales    | Methylophilaceae    | Methylophilus    | ASV1 day 0 vs. day 14 |
| 20.607.991181.92714.14663.37E-0.0030 | Bacteroidia         | Chitinophagales    | Chitinophagaceae    | Niabella         | ASV2 day 0 vs. day 14 |
| 74 1077 53 2514 05 57676             | Bacteroidia         | Chitinophagales    | Chitinophagaceae    | Niabella         | ASV2 day 0 vs. day 14 |
| 26.807.945241.93474.10654.02E-0.0035 | Bacteroidia         | Sphingobacteriales | Sphingobacteriaceae | Pedobacter       | ASV1 day 0 vs. day 14 |
| 03 6035 54823 90634 05 17925         | Bacteroidia         | Sphingobacteriales | Sphingobacteriaceae | Pedobacter       | ASV1 day 0 vs. day 14 |
| 117.87.940451.46875.40636.43E-1.89E- | Proteobacteria      | Pseudomonadales    | Moraxellaceae       | unclassified     | ASV3 day 0 vs. day 14 |
| 85 9764 38571 12545 08 05            | Proteobacteria      | Pseudomonadales    | Moraxellaceae       | unclassified     | ASV3 day 0 vs. day 14 |
| 28.117.858971.84304.26422.01E-0.0020 | Proteobacteria      | Pseudomonadales    | Pseudomonadaceae    | Pseudomonas      | ASV1 day 0 vs. day 14 |
| 38 7226 05608 1775 05 12565          | Proteobacteria      | Pseudomonadales    | Pseudomonadaceae    | Pseudomonas      | ASV1 day 0 vs. day 14 |
| 30.757.703991.99813.85550.00010.0087 | Chloroflexia        | Chloroflexales     | Chloroflexaceae     | FFCH7168         | ASV1 day 0 vs. day 14 |
| 11 477 5482 54481 15468 52185        | Chloroflexia        | Chloroflexales     | Chloroflexaceae     | FFCH7168         | ASV1 day 0 vs. day 14 |
| 153.27.684861.62304.73472.19E-0.0003 | Alphaproteobacteria | Sphingomonadales   | Sphingomonadaceae   | Novosphingobium  | ASV2 day 0 vs. day 14 |
| 21 0634 86084 21535 06 56573         | Alphaproteobacteria | Sphingomonadales   | Sphingomonadaceae   | Novosphingobium  | ASV2 day 0 vs. day 14 |
| 52.987.426491.48475.00195.67E-0.0001 | Alphaproteobacteria | Sphingomonadales   | Sphingomonadaceae   | Novosphingobium  | ASV8 day 0 vs. day 14 |
| 24 7907 17087 61633 07 12112         | Alphaproteobacteria | Sphingomonadales   | Sphingomonadaceae   | Novosphingobium  | ASV8 day 0 vs. day 14 |
| 34.997.405342.20293.36160.00070.0419 | Chloroflexia        | Chloroflexales     | Chloroflexaceae     | FFCH7168         | ASV1 day 0 vs. day 14 |
| 69 3183 00671 32814 74831 84007      | Chloroflexia        | Chloroflexales     | Chloroflexaceae     | FFCH7168         | ASV1 day 0 vs. day 14 |
| 326.87.374541.41195.22301.76E-4.57E- | Bacteroidia         | Flavobacteriales   | Flavobacteriaceae   | Flavobacterium   | ASV6 day 0 vs. day 14 |
| 21 6031 24102 4706 07 05             | Bacteroidia         | Flavobacteriales   | Flavobacteriaceae   | Flavobacterium   | ASV6 day 0 vs. day 14 |
| 30.077.292491.72644.22402.40E-0.0023 | Alphaproteobacteria | Caulobacteriales   | Caulobacteraceae    | unclassified     | ASV1 day 0 vs. day 14 |
| 52 9364 07211 89958 05 45537         | Alphaproteobacteria | Caulobacteriales   | Caulobacteraceae    | unclassified     | ASV1 day 0 vs. day 14 |
| 32.367.259991.61924.48357.34E-0.0009 | Alphaproteobacteria | Caulobacteriales   | Caulobacteraceae    | Phenylobacterium | ASV1 day 0 vs. day 14 |
| 1 2261 61858 19589 06 00552          | Alphaproteobacteria | Caulobacteriales   | Caulobacteraceae    | Phenylobacterium | ASV1 day 0 vs. day 14 |
| 27.277.022042.08523.36750.00070.0412 | Acidobacteriota     | Blastocatellales   | Blastocatellaceae   | Blastocatella    | ASV1 day 0 vs. day 14 |
| 48 9886 13007 45599 58405 59669      | Acidobacteriota     | Blastocatellales   | Blastocatellaceae   | Blastocatella    | ASV1 day 0 vs. day 14 |

|         |         |         |         |              |        |                   |                     |                      |                      |                             |                       |
|---------|---------|---------|---------|--------------|--------|-------------------|---------------------|----------------------|----------------------|-----------------------------|-----------------------|
| 27.806  | 971052  | 0.0404  | 3.4164  | 0.0006       | 0.0361 | Verrucomicrobiota | Verrucomicrobiae    | Verrucomicrobiales   | Rubritaleaceae       | Luteolibacter               | ASV1 day 0 vs. day 14 |
| 81      | 3553    | 29876   | 63185   | 34402        | 15432  |                   |                     |                      |                      |                             |                       |
| 14.896  | 6.87832 | 1.59144 | 3.3220  | 1.55E-0.0016 |        | Actinobacteriota  | Thermoleophilia     | Solirubrobacteriales | Solirubrobacteraceae | Patulibacter                | ASV3 day 0 vs. day 14 |
| 62      | 5364    | 45059   | 62721   | 05           | 29341  |                   |                     |                      |                      |                             |                       |
| 12.636  | 8.83582 | 1.76933 | 3.86350 | 0.00010      | 0.0085 | Proteobacteria    | Alphaproteobacteria | Rhizobiales          | Rhizobiaceae         | Neorhizobium                | ASV3 day 0 vs. day 14 |
| 92      | 0807    | 00097   | 73409   | 1174         | 65909  |                   |                     |                      |                      |                             |                       |
| 19.886  | 8.81797 | 1.74503 | 3.90699 | 3.35E-0.0073 |        | Proteobacteria    | Alphaproteobacteria | Rhizobiales          | Rhizobiaceae         | Shinella                    | ASV2 day 0 vs. day 14 |
| 46      | 8846    | 79679   | 72803   | 05           | 74023  |                   |                     |                      |                      |                             |                       |
| 34.426  | 5.59796 | 1.77553 | 3.71600 | 0.00020      | 0.0140 | Actinobacteriota  | Actinobacteria      | Micrococcales        | Microbacteriaceae    | unclassified                | ASV1 day 0 vs. day 14 |
| 55      | 8739    | 39786   | 35424   | 02373        | 02151  |                   |                     |                      |                      |                             |                       |
| 322.26  | 5.55067 | 1.92793 | 3.39760 | 0.00060      | 0.0380 | Proteobacteria    | Alphaproteobacteria | Sphingomonadales     | Sphingomonadaceae    | Novosphingobium             | ASV7 day 0 vs. day 14 |
| 11      | 2377    | 76209   | 93575   | 79565        | 44356  |                   |                     |                      |                      |                             |                       |
| 40.196  | 4.28641 | 1.68793 | 3.80860 | 0.00010      | 0.0103 | Proteobacteria    | Alphaproteobacteria | Caulobacteriales     | Caulobacteraceae     | Brevundimonas               | ASV8 day 0 vs. day 14 |
| 6       | 0002    | 07171   | 4547    | 3973         | 01852  |                   |                     |                      |                      |                             |                       |
| 167.86  | 3.73791 | 1.76013 | 3.62100 | 0.00020      | 0.0189 | Bacteroidota      | Bacteroidia         | Flavobacteriales     | Flavobacteriaceae    | Flavobacterium              | ASV1 day 0 vs. day 14 |
| 63      | 0004    | 99212   | 61731   | 93396        | 40218  |                   |                     |                      |                      |                             |                       |
| 16.696  | 1.76861 | 1.86213 | 3.31700 | 0.00090      | 0.0481 | Verrucomicrobiota | Verrucomicrobiae    | Verrucomicrobiales   | Verrucomicrobiaceae  | unclassified                | ASV3 day 0 vs. day 14 |
| 96      | 6697    | 77632   | 12616   | 09855        | 40254  |                   |                     |                      |                      |                             |                       |
| 77.365  | 9.88851 | 1.42174 | 2.21222 | 2.53E-0.0024 |        | Proteobacteria    | Gammaproteobacteria | Cellvibrionales      | Cellvibrionaceae     | Cellvibrio                  | ASV4 day 0 vs. day 14 |
| 62      | 143     | 54964   | 95072   | 05           | 5369   |                   |                     |                      |                      |                             |                       |
| 41.415  | 5.56527 | 1.61943 | 3.43640 | 0.00050      | 0.0342 | Proteobacteria    | Alphaproteobacteria | Reyranellales        | Reyranellaceae       | Reyranella                  | ASV1 day 0 vs. day 14 |
| 58      | 9247    | 74236   | 72852   | 89341        | 07214  |                   |                     |                      |                      |                             |                       |
| 2060.3  | 8.87197 | 2.2535  | 3.9368  | 8.25E-0.0066 |        | Proteobacteria    | Gammaproteobacteria | Pseudomonadales      | Pseudomonadaceae     | Pseudomonas                 | ASV1 day 0 vs. day 14 |
| 3       | 114     | 54775   | 7841    | 05           | 6912   |                   |                     |                      |                      |                             |                       |
| 80.6744 | 11.5967 | 3.3903  | 3.4204  | 0.00060      | 0.0358 | Proteobacteria    | Alphaproteobacteria | Rhizobiales          | Beijerinckiaceae     | 1174-901-12                 | ASV3 day 0 vs. day 14 |
| 44      | 316     | 98803   | 6241    | 25148        | 91462  |                   |                     |                      |                      |                             |                       |
| 81.1113 | 11.6045 | 3.4010  | 3.4120  | 0.00060      | 0.0365 | Proteobacteria    | Alphaproteobacteria | Rhizobiales          | Beijerinckiaceae     | unclassified                | ASV3 day 0 vs. day 14 |
| 13      | 261     | 54395   | 3779    | 44792        | 52648  |                   |                     |                      |                      |                             |                       |
| 154.799 | 12.5369 | 3.3900  | 3.6982  | 0.00020      | 0.0148 | Proteobacteria    | Alphaproteobacteria | Rhizobiales          | Beijerinckiaceae     | 1174-901-12                 | ASV1 day 0 vs. day 14 |
| 99      | 151     | 00929   | 0404    | 1713         | 70672  |                   |                     |                      |                      |                             |                       |
| 197.395 | 12.8875 | 3.4027  | 3.7874  | 0.00010      | 0.0110 | Proteobacteria    | Alphaproteobacteria | Rhizobiales          | Beijerinckiaceae     | 1174-901-12                 | ASV1 day 0 vs. day 14 |
| 95      | 84      | 38788   | 1503    | 52223        | 41876  |                   |                     |                      |                      |                             |                       |
| 2.64697 | -       | 4.6555  | 4.6079  | 4.07E-0.0005 |        | Firmicutes        | Clostridia          | Clostridiales        | Clostridiaceae       | Clostridium sensu stricto 1 | ASV9 day 0 vs. day 14 |
| 97      | 21.4526 | 44079   | 684     | 06           | 65582  |                   |                     |                      |                      |                             |                       |
| 2.61346 | 21.4987 | 4.6555  | 4.6178  | 3.88E-0.0005 |        | Proteobacteria    | Alphaproteobacteria | Rhizobiales          | Beijerinckiaceae     | 1174-901-12                 | ASV9 day 0 vs. day 14 |
| 46      | 394     | 8165    | 4177    | 06           | 50689  |                   |                     |                      |                      |                             |                       |

|         |         |            |             |              |            |                 |                     |                                     |                                     |                             |                             |                       |
|---------|---------|------------|-------------|--------------|------------|-----------------|---------------------|-------------------------------------|-------------------------------------|-----------------------------|-----------------------------|-----------------------|
| 3.08255 | -       | 21.7254973 | 4.655091494 | -            | 4.6670398  | 3.06E-0.0004    | Firmicutes          | Bacilli                             | Erysipelotrichales                  | Erysipelotrichaceae         | Turicibacter                | ASV8 day 0 vs. day 14 |
| 3.58514 | -       | 21.9528538 | 4.654708498 | -            | 4.71626823 | 2.40E-0.0003    | Firmicutes          | Clostridia                          | Peptostreptococcales-Tissierellales | Peptostreptococcaceae       | Intestinibacter             | ASV7 day 0 vs. day 14 |
| 5.49842 | -       | 22.1459834 | 4.653891154 | -            | 4.75859505 | 1.95E-0.0003    | Proteobacteria      | Gammaproteobacteria                 | Enterobacterales                    | unclassified                | unclassified                | ASV6 day 0 vs. day 14 |
| 8.58589 | -       | 22.647402  | 3.944070789 | -            | 5.74213882 | 9.35E-4.07E-    | Firmicutes          | Clostridia                          | Clostridiales                       | Clostridiaceae              | Clostridium sensu stricto 1 | ASV4 day 0 vs. day 14 |
| 7.76371 | -       | 22.718201  | 4.653444198 | -            | 4.88201856 | 1.05E-0.0001    | Verrucomicrobiota   | Verrucomicrobiae                    | Pedosphaerales                      | Pe-dosphaeraceae            | unclassified                | ASV6 day 0 vs. day 14 |
| 9.60228 | -       | 22.9777921 | 4.173484943 | -            | 5.50566072 | 3.68E-1.18E-    | Firmicutes          | Clostridia                          | Clostridiales                       | Clostridiaceae              | Clostridium sensu stricto 1 | ASV4 day 0 vs. day 14 |
| 11.1228 | -       | 23.512336  | 4.554946533 | -            | 5.16193458 | 2.44E-5.98E-    | Firmicutes          | Clostridia                          | Peptostreptococcales-Tissierellales | Peptostreptococcaceae       | Romboutsia                  | ASV3 day 0 vs. day 14 |
| 13.3937 | -       | 23.6442614 | 4.255111629 | -            | 5.55667241 | 2.75E-9.76E-    | Bacteroidota        | Bacteroidia                         | Chitinophagales                     | Chitinophagaceae            | unclassified                | ASV4 day 0 vs. day 14 |
| 28.4801 | -       | 24.8572563 | 4.652653983 | -            | 5.34259724 | 9.16E-2.63E-    | Firmicutes          | Bacilli                             | Lactobacillales                     | Enterococcaceae             | Enterococcus                | ASV1 day 0 vs. day 14 |
| 21.379  | 42.6173 | 3.2993     | 12.9173     | 3.61E-2.43E- | 38 34      | Proteobacteria  | Alphaproteobacteria | Rhizobiales                         | Xanthobacteraceae                   | unclassified                | ASV2 day 14 vs. day 28      |                       |
| 21.9844 | 41.3361 | 3.0915     | 13.3708     | 8.99E-1.21E- | 41 36      | Proteobacteria  | Gammaproteobacteria | Burkholderiales                     | Chromobacteriaceae                  | Chromobacterium             | ASV2 day 14 vs. day 28      |                       |
| 25.7165 | 30.4546 | 4.6635     | 6.5302      | 6.56E-7.44E- | 11 08      | Bacteroidota    | Bacteroidia         | Flavobacteriales                    | Weekselaceae                        | Elizabethkingia             | ASV2 day 14 vs. day 28      |                       |
| 8.58589 | 19.2878 | 3.9627     | 4.8673      | 1.13E-0.0002 | 06 03494   | Firmicutes      | Clostridia          | Clostridiales                       | Clostridiaceae                      | Clostridium sensu stricto 1 | ASV4 day 14 vs. day 28      |                       |
| 11.1228 | 19.1846 | 4.5739     | 4.1943      | 2.74E-0.0025 | 05 63985   | Firmicutes      | Clostridia          | Peptostreptococcales-Tissierellales | Peptostreptococcaceae               | Romboutsia                  | ASV3 day 14 vs. day 28      |                       |
| 9.60228 | 19.1365 | 4.1930     | 4.5638      | 5.02E-0.0006 | 06 39231   | Firmicutes      | Clostridia          | Clostridiales                       | Clostridiaceae                      | Clostridium sensu stricto 1 | ASV4 day 14 vs. day 28      |                       |
| 335.262 | 12.2671 | 1.7222     | 7.1229      | 1.06E-2.38E- | 12 09      | Myxococcota     | Polyangia           | Polyangiales                        | Sandaracinaceae                     | unclassified                | ASV5 day 14 vs. day 28      |                       |
| 108.927 | 11.8567 | 1.7872     | 6.6341      | 3.26E-4.89E- | 11 08      | Acidobacteriota | Blastocatellia      | Blastocatellales                    | Blastocatellaceae                   | unclassified                | ASV3 day 14 vs. day 28      |                       |

|                                        |      |       |       |    |       |                   |                     |                    |                     |                |        |                   |
|----------------------------------------|------|-------|-------|----|-------|-------------------|---------------------|--------------------|---------------------|----------------|--------|-------------------|
| 337.611.72851.72146.81329.54E-1.61E-06 | 4377 | 25622 | 73614 | 12 | 08    | Myxococcota       | Polyangia           | Polyangiales       | San-daracinacea     | unclassified   | ASV4   | day 14 vs. day 28 |
| 89.6410.90191.73476.28443.29E-3.17E-53 | 4519 | 40523 | 81768 | 10 | 07    | Verrucomicrobiota | Verrucomicrobiae    | Verrucomicrobiales | Verrucomicrobiaceae | unclassified   | ASV51  | day 14 vs. day 28 |
| 96.5510.64921.74076.11769.50E-7.54E-13 | 7653 | 43469 | 59911 | 10 | 07    | Bacteroidota      | Bacteroidia         | Cytophagales       | Microscillaceae     | Chryseolinea   | ASV47  | day 14 vs. day 28 |
| 99.8210.59841.94885.43825.38E-1.65E-62 | 7516 | 91731 | 06232 | 08 | 05    | Bacteroidota      | Bacteroidia         | Flavobacteriales   | Flavobacteriaceae   | Flavobacterium | ASV44  | day 14 vs. day 28 |
| 53.1910.33231.73365.96002.52E-1.70E-23 | 6069 | 03711 | 47632 | 09 | 06    | Verrucomicrobiota | Verrucomicrobiae    | Verrucomicrobiales | Rubritaleaceae      | Luteolibacter  | ASV89  | day 14 vs. day 28 |
| 62.7210.31331.72125.99192.07E-1.55E-53 | 3498 | 10992 | 06296 | 09 | 06    | Bacteroidota      | Bacteroidia         | Chitinophagales    | Chitinophagaceae    | Terrimonas     | ASV76  | day 14 vs. day 28 |
| 73.2010.26082.32814.40711.05E-0.0011   | 0773 | 99479 | 85819 | 05 | 87323 | Bacteroidota      | Bacteroidia         | Flavobacteriales   | Flavobacteriaceae   | Flavobacterium | ASV64  | day 14 vs. day 28 |
| 98.1310.19581.80585.64591.64E-6.33E-04 | 5839 | 57685 | 92191 | 08 | 06    | Bacteroidota      | Bacteroidia         | Chitinophagales    | Chitinophagaceae    | unclassified   | ASV45  | day 14 vs. day 28 |
| 121.610.17251.71405.93462.94E-1.82E-11 | 2567 | 88507 | 56015 | 09 | 06    | Bacteroidota      | Bacteroidia         | Chitinophagales    | Chitinophagaceae    | Parafilimonas  | ASV28  | day 14 vs. day 28 |
| 80.2310.08301.73115.82445.73E-2.86E-77 | 7766 | 67999 | 36258 | 09 | 06    | Bacteroidota      | Bacteroidia         | Flavobacteriales   | Flavobacteriaceae   | Flavobacterium | ASV56  | day 14 vs. day 28 |
| 140.710.05671.81415.54352.96E-1.03E-7  | 499  | 48957 | 08357 | 08 | 05    | Myxococcota       | Polyangia           | Polyangiales       | San-daracinacea     | unclassified   | ASV25  | day 14 vs. day 28 |
| 37.439.948242.28584.35211.35E-0.0014   | 6949 | 30385 | 3698  | 05 | 78822 | Bacteroidota      | Bacteroidia         | Cytophagales       | Microscillaceae     | Ohtaekwangia   | ASV134 | day 14 vs. day 28 |
| 70.979.913321.71375.78467.27E-3.38E-51 | 3699 | 28083 | 53817 | 09 | 06    | Proteobacteria    | Gammaproteobacteria | Burkholderiales    | Comamonadaceae      | unclassified   | ASV67  | day 14 vs. day 28 |
| 73.459.902791.71595.77097.88E-3.54E-51 | 9295 | 71215 | 58865 | 09 | 06    | Proteobacteria    | Gammaproteobacteria | Pseudomonadales    | Moraxellaceae       | Cavicella      | ASV63  | day 14 vs. day 28 |
| 51.829.853041.96925.00355.63E-0.0001   | 3828 | 26315 | 10135 | 07 | 12112 | Bacteroidota      | Bacteroidia         | Flavobacteriales   | Flavobacteriaceae   | Flavobacterium | ASV93  | day 14 vs. day 28 |
| 41.959.813611.91075.13602.81E-6.55E-55 | 1111 | 40516 | 25028 | 07 | 05    | Bacteroidota      | Bacteroidia         | Flavobacteriales   | Flavobacteriaceae   | Flavobacterium | ASV117 | day 14 vs. day 28 |
| 90.599.806351.71855.70621.16E-4.58E-41 | 3238 | 37829 | 19014 | 08 | 06    | Bacteroidota      | Bacteroidia         | Cytophagales       | Microscillaceae     | unclassified   | ASV50  | day 14 vs. day 28 |



|                                      |    |      |       |       |       |       |                             |                               |                         |                               |                      |            |                         |
|--------------------------------------|----|------|-------|-------|-------|-------|-----------------------------|-------------------------------|-------------------------|-------------------------------|----------------------|------------|-------------------------|
| 158.09.773851.71125.71151.12E-4.58E- | 39 | 0052 | 50768 | 24129 | 08    | 06    | Proteo-<br>bacteria         | Gammap-<br>roteobac-<br>teria | Steroidobacter-<br>ales | Steroido-<br>bacteraceae      | unclassified         | ASV2<br>0  | day 14<br>vs. day<br>28 |
| 178.09.733551.70225.71811.08E-4.54E- | 06 | 4038 | 12753 | 77132 | 08    | 06    | Bacteroi-<br>dota           | Bacte-<br>roidia              | Chitinophagales         | Chitinoph-<br>agaceae         | unclassified         | ASV1<br>6  | day 14<br>vs. day<br>28 |
| 30.119.697322.30394.20902.56E-0.0024 | 47 | 1242 | 41671 | 13345 | 05    | 71814 | Verru-<br>comicro-<br>biota | Verru-<br>comicro-<br>biae    | Verrucomicro-<br>biales | Rubri-<br>taleaceae           | unclassified         | ASV1<br>71 | day 14<br>vs. day<br>28 |
| 44.969.681601.94474.97836.41E-0.0001 | 99 | 6985 | 2979  | 81591 | 07    | 2015  | Acido-<br>bacteri-<br>ota   | Vicina-<br>mibacteria         | Vicinamibacter-<br>ales | unclassified                  | unclassified         | ASV1<br>07 | day 14<br>vs. day<br>28 |
| 39.699.637851.99484.83121.36E-0.0002 | 8  | 7897 | 90422 | 71829 | 06    | 40839 | Proteo-<br>bacteria         | Gammap-<br>roteobac-<br>teria | Cellvibrionales         | Spongiibac-<br>teraceae       | BD1-7 clade          | ASV1<br>24 | day 14<br>vs. day<br>28 |
| 26.569.615202.35754.07844.53E-0.0039 | 21 | 3021 | 34986 | 98549 | 05    | 20246 | Plancto-<br>mycetota        | Plancto-<br>mycetes           | Pirellulales            | Pirellu-<br>laceae            | Pir4 lineage         | ASV1<br>97 | day 14<br>vs. day<br>28 |
| 190.39.501591.73815.46644.59E-1.44E- | 06 | 6299 | 76548 | 16118 | 08    | 05    | Myxo-<br>coccota            | Polyangia                     | Polyangiales            | San-<br>daracinacea<br>e      | unclassified         | ASV1<br>4  | day 14<br>vs. day<br>28 |
| 51.509.446891.96134.81651.46E-0.0002 | 05 | 8942 | 41805 | 49016 | 06    | 55931 | Bacteroi-<br>dota           | Bacte-<br>roidia              | Flavobacteriales        | Flavobacte-<br>riaceae        | Flavobacte-<br>rium  | ASV9<br>2  | day 14<br>vs. day<br>28 |
| 73.829.440331.96324.80861.52E-0.0002 | 81 | 1614 | 14385 | 09638 | 06    | 59565 | Proteo-<br>bacteria         | Alphapro-<br>teobacteria      | Sphingomona-<br>dales   | Sphingo-<br>mona-<br>daceae   | Novosphingo-<br>bium | ASV6<br>2  | day 14<br>vs. day<br>28 |
| 34.009.422102.15654.36901.25E-0.0013 | 2  | 7784 | 58328 | 48434 | 05    | 80045 | Proteo-<br>bacteria         | Gammap-<br>roteobac-<br>teria | Burkholderiales         | Comamon-<br>adaceae           | unclassified         | ASV1<br>52 | day 14<br>vs. day<br>28 |
| 141.89.417321.79465.24731.54E-4.16E- | 58 | 6568 | 93093 | 18667 | 07    | 05    | Bacteroi-<br>dota           | Bacte-<br>roidia              | Chitinophagales         | Chitinoph-<br>agaceae         | Chitinophaga         | ASV2<br>4  | day 14<br>vs. day<br>28 |
| 68.559.336761.72225.42115.92E-1.78E- | 57 | 5889 | 95656 | 16785 | 08    | 05    | Verru-<br>comicro-<br>biota | Verru-<br>comicro-<br>biae    | Pedosphaerales          | Pe-<br>dosphaerac-<br>eae     | unclassified         | ASV7<br>1  | day 14<br>vs. day<br>28 |
| 26.379.317562.66383.49770.00040.0282 | 5  | 5231 | 42725 | 91045 | 69129 | 56617 | Acido-<br>bacteri-<br>ota   | Vicina-<br>mibacteria         | Vicinamibacter-<br>ales | Vicina-<br>mibacter-<br>aceae | Luteitalea           | ASV1<br>99 | day 14<br>vs. day<br>28 |
| 27.989.250642.30044.02115.79E-0.0049 | 62 | 3827 | 97354 | 49517 | 05    | 14383 | Bacteroi-<br>dota           | Bacte-<br>roidia              | Flavobacteriales        | Flavobacte-<br>riaceae        | Flavobacte-<br>rium  | ASV1<br>92 | day 14<br>vs. day<br>28 |
| 33.349.170741.91714.78351.72E-0.0002 | 79 | 2569 | 38499 | 57669 | 06    | 90448 | Bacteroi-<br>dota           | Bacte-<br>roidia              | Flavobacteriales        | Flavobacte-<br>riaceae        | Flavobacte-<br>rium  | ASV1<br>58 | day 14<br>vs. day<br>28 |
| 42.269.140261.96714.64643.38E-0.0004 | 2  | 4764 | 57375 | 32908 | 06    | 89954 | Proteo-<br>bacteria         | Gammap-<br>roteobac-<br>teria | Burkholderiales         | Comamon-<br>adaceae           | unclassified         | ASV1<br>11 | day 14<br>vs. day<br>28 |
| 27.489.137272.48443.67770.00020.0157 | 67 | 8807 | 72328 | 54308 | 35296 | 94127 | Proteo-<br>bacteria         | Alphapro-<br>teobacteria      | Rhizobiales             | unclassified                  | unclassified         | ASV1<br>95 | day 14<br>vs. day<br>28 |

|        |         |         |        |                |                   |                     |                     |                     |                   |        |                   |
|--------|---------|---------|--------|----------------|-------------------|---------------------|---------------------|---------------------|-------------------|--------|-------------------|
| 31.799 | 1.1281  | 2.3301  | 3.9108 | 9.20E-0.0073   | Bacteroidia       | Bacteroidia         | Chitinophagales     | Chitinophagaceae    | Terrimonas        | ASV162 | day 14 vs. day 28 |
| 76.209 | 0.08068 | 1.76015 | 1.5912 | 4.8E-5.98E-05  | Bacteroidia       | Bacteroidia         | Sphingobacteriales  | env.OPS 17          | unclassified      | ASV61  | day 14 vs. day 28 |
| 48.269 | 0.03512 | 1.75935 | 1.3542 | 8.1E-6.55E-05  | Bacteroidia       | Bacteroidia         | Flavobacteriales    | Crocini-tomicaceae  | Fluviicola        | ASV100 | day 14 vs. day 28 |
| 24.949 | 0.00870 | 1.96524 | 5.8404 | 5.6E-0.0006    | Acidobacteriota   | Acidobacteriae      | Paludibaculum       | unclassified        | unclassified      | ASV208 | day 14 vs. day 28 |
| 46.339 | 0.00481 | 1.78425 | 0.4674 | 4.9E-9.47E-05  | Proteobacteria    | Gammaproteobacteria | Burkholderiales     | SC-I-84             | unclassified      | ASV105 | day 14 vs. day 28 |
| 24.168 | 0.99302 | 2.30083 | 3.9085 | 9.29E-0.0073   | Verrucomicrobiota | Verrucomicrobiae    | Verrucomicrobiales  | Rubritaleaceae      | Luteolibacter     | ASV221 | day 14 vs. day 28 |
| 28.088 | 0.98614 | 2.31043 | 3.8893 | 0.00010.0078   | Proteobacteria    | Gammaproteobacteria | Burkholderiales     | Comamonadaceae      | unclassified      | ASV187 | day 14 vs. day 28 |
| 37.488 | 0.94180 | 1.95044 | 5.8434 | 5.5E-0.0006    | Proteobacteria    | Gammaproteobacteria | Xanthomonadales     | Xanthomonadaceae    | Thermomonas       | ASV135 | day 14 vs. day 28 |
| 24.318 | 0.91992 | 2.28833 | 3.8979 | 9.70E-0.0076   | Proteobacteria    | Gammaproteobacteria | Xanthomonadales     | Xanthomonadaceae    | Pseudoxanthomonas | ASV217 | day 14 vs. day 28 |
| 49.038 | 0.91846 | 1.72725 | 1.6352 | 4.2E-5.98E-05  | Proteobacteria    | Alphaproteobacteria | Reyranellales       | Reyranellaceae      | Reyranella        | ASV95  | day 14 vs. day 28 |
| 21.198 | 0.91711 | 2.33813 | 3.8136 | 0.00010.0102   | Bacteroidia       | Bacteroidia         | Sphingobacteriales  | Sphingobacteriaceae | Mucilagibacter    | ASV259 | day 14 vs. day 28 |
| 21.258 | 0.89473 | 2.38683 | 3.7265 | 0.00010.0136   | Proteobacteria    | Alphaproteobacteria | Sphingomonadales    | Sphingomonadaceae   | Novosphingobium   | ASV258 | day 14 vs. day 28 |
| 20.858 | 0.78990 | 2.57753 | 4.1020 | 0.00060.0366   | Bacteroidia       | Bacteroidia         | Cytophagales        | Microscillaceae     | unclassified      | ASV275 | day 14 vs. day 28 |
| 22.308 | 0.76643 | 2.32133 | 3.7763 | 0.00010.0114   | Bacteroidia       | Bacteroidia         | Flavobacteriales    | Flavobacteriaceae   | Flavobacterium    | ASV247 | day 14 vs. day 28 |
| 24.908 | 0.74420 | 1.74375 | 0.1475 | 3.1E-0.0001    | Verrucomicrobiota | Verrucomicrobiae    | Chthoniobacteriales | Chthoniobacteraceae | Chthoniobacter    | ASV210 | day 14 vs. day 28 |
| 39.868 | 0.74347 | 1.73015 | 0.5354 | 3.4E-9.44E-05  | Acidobacteriota   | Acidobacteriae      | unclassified        | unclassified        | unclassified      | ASV121 | day 14 vs. day 28 |
| 190.28 | 0.72851 | 1.68025 | 1.9462 | 0.05E-5.22E-05 | Bacteroidia       | Bacteroidia         | Flavobacteriales    | Flavobacteriaceae   | Flavobacterium    | ASV15  | day 14 vs. day 28 |

|        |         |        |        |               |                   |                     |                     |                      |                     |                   |                   |                   |
|--------|---------|--------|--------|---------------|-------------------|---------------------|---------------------|----------------------|---------------------|-------------------|-------------------|-------------------|
| 50.93  | 8.72265 | 1.7461 | 4.9954 | 5.87E-0.0001  | Proteo-           | Gammaproteobacteria | Xanthomonadales     | Xanthomonadaceae     | Arenimonas          | ASV90             | day 14 vs. day 28 |                   |
| 18.60  | 8.71075 | 2.3084 | 3.7734 | 0.0001        | 0.0115            | Bacteroidota        | Bacteroidia         | Chitinophagales      | Chitinophagaceae    | Edaphobacterium   | ASV299            | day 14 vs. day 28 |
| 39.99  | 8.6441  | 2.1730 | 7.4994 | 5.90E-0.0001  | Planctomycetota   | Planctomycetes      | Planctomycetales    | unclassified         | unclassified        | ASV119            | day 14 vs. day 28 |                   |
| 101.08 | 6.1568  | 1.9527 | 4.4120 | 1.02E-0.0011  | Proteobacteria    | Alphaproteobacteria | Sphingomonadales    | Sphingomonadaceae    | Novosphingobium     | ASV40             | day 14 vs. day 28 |                   |
| 14.49  | 8.6047  | 3.2324 | 1.3702 | 2.0002        | 0.0147            | Bacteroidota        | Bacteroidia         | Sphingobacteriales   | env.OPS 17          | unclassified      | ASV375            | day 14 vs. day 28 |
| 15.07  | 8.6022  | 1.2248 | 3.8663 | 0.0001        | 0.0085            | Bacteroidota        | Bacteroidia         | Cytophagales         | Cyclobacteriaceae   | Algoriphagus      | ASV365            | day 14 vs. day 28 |
| 14.18  | 8.5892  | 2.3283 | 3.6889 | 0.0002        | 0.0152            | Proteobacteria      | Gammaproteobacteria | Xanthomonadales      | Xanthomonadaceae    | Pseudoxanthomonas | ASV380            | day 14 vs. day 28 |
| 23.68  | 8.5783  | 1.9749 | 4.3435 | 1.40E-0.0015  | Actinobacteriota  | Actinobacteria      | Streptomycetales    | Streptomycetaceae    | Streptomyces        | ASV218            | day 14 vs. day 28 |                   |
| 21.29  | 8.5730  | 1.9444 | 4.4090 | 1.04E-0.0011  | Bacteroidota      | Bacteroidia         | Sphingobacteriales  | NS11-12 marine group | unclassified        | ASV249            | day 14 vs. day 28 |                   |
| 14.95  | 8.5717  | 4.2219 | 3.8577 | 0.0001        | 0.0087            | Verrucomicrobiota   | Verrucomicrobiae    | Verrucomicrobiales   | Verrucomicrobiaceae | unclassified      | ASV362            | day 14 vs. day 28 |
| 52.56  | 8.4640  | 1.8971 | 4.4615 | 8.14E-0.0009  | Proteobacteria    | Gammaproteobacteria | Burkholderiales     | Comamonadaceae       | unclassified        | ASV87             | day 14 vs. day 28 |                   |
| 13.38  | 8.4544  | 3.2499 | 3.3826 | 0.0007        | 0.0397            | Proteobacteria      | Alphaproteobacteria | Sphingomonadales     | Sphingomonadaceae   | Sphingorhabdus    | ASV396            | day 14 vs. day 28 |
| 28.57  | 8.3382  | 2.1938 | 3.4301 | 6.170E-0.0017 | Proteobacteria    | Alphaproteobacteria | Caulobacteriales    | Caulobacteraceae     | unclassified        | ASV174            | day 14 vs. day 28 |                   |
| 40.02  | 8.2856  | 1.7564 | 4.7173 | 2.39E-0.0003  | Bacteroidota      | Bacteroidia         | Chitinophagales     | Chitinophagaceae     | Ferruginibacter     | ASV122            | day 14 vs. day 28 |                   |
| 16.41  | 8.2787  | 0.1952 | 8.4239 | 2.24E-0.0022  | Verrucomicrobiota | Verrucomicrobiae    | Chthoniobacteriales | Terrimicrobiaceae    | Terrimicrobium      | ASV314            | day 14 vs. day 28 |                   |
| 16.48  | 8.2781  | 5.2226 | 1.3718 | 5.0002        | 0.0139            | Bacteroidota        | Bacteroidia         | Cytophagales         | Spirosomaceae       | Dyadobacter       | ASV333            | day 14 vs. day 28 |
| 25.46  | 8.2775  | 1.1742 | 9.4749 | 1.204E-0.0003 | Acidobacteriota   | Vicinamibacteria    | Vicinamibacteriales | Vicinamibacteraceae  | unclassified        | ASV205            | day 14 vs. day 28 |                   |

|       |         |         |         |              |                             |                               |                         |                                  |                                      |            |                         |
|-------|---------|---------|---------|--------------|-----------------------------|-------------------------------|-------------------------|----------------------------------|--------------------------------------|------------|-------------------------|
| 15.53 | 8.26606 | 2.08193 | 9.7037  | 1.8E-0.0059  | Proteo-<br>bacteria         | Alphapro-<br>teobacteria      | Rhodobacterales         | Rhodobac-<br>teraceae            | unclassified                         | ASV3<br>50 | day 14<br>vs. day<br>28 |
| 16.85 | 8.25245 | 2.47743 | 3.33090 | 0.00080.0459 | Bacteroi-<br>dota           | Bacte-<br>roidia              | Sphingobacte-<br>riales | Sphingo-<br>bacteri-<br>aceae    | Mucilagini-<br>bacter                | ASV3<br>23 | day 14<br>vs. day<br>28 |
| 23.92 | 8.18984 | 1.95604 | 1.8692  | 2.83E-0.0026 | Bacteroi-<br>dota           | Bacte-<br>roidia              | Chitinophagales         | Chitinoph-<br>agaceae            | Taibaiella                           | ASV2<br>23 | day 14<br>vs. day<br>28 |
| 15.96 | 8.18302 | 1.95024 | 1.9582  | 2.72E-0.0025 | Proteo-<br>bacteria         | Gammap-<br>roteobac-<br>teria | Xanthomona-<br>dales    | Rhodano-<br>bacteraceae          | Tahibacter                           | ASV3<br>41 | day 14<br>vs. day<br>28 |
| 27.42 | 8.15300 | 1.74084 | 1.68322 | 2.82E-0.0004 | Proteo-<br>bacteria         | Alphapro-<br>teobacteria      | Caulobacterales         | Caulobac-<br>teraceae            | Phenylobacte-<br>rium                | ASV1<br>91 | day 14<br>vs. day<br>28 |
| 16.90 | 8.13583 | 2.24993 | 3.61590 | 0.00020.0192 | Verru-<br>comicro-<br>biota | Verru-<br>comicro-<br>biae    | Chthoniobacter-<br>ales | Xiphin-<br>ematobac-<br>teraceae | Candidatus<br>Xiphinemato-<br>bacter | ASV3<br>18 | day 14<br>vs. day<br>28 |
| 39.09 | 8.09782 | 1.72844 | 1.68492 | 2.80E-0.0004 | Bacteroi-<br>dota           | Bacte-<br>roidia              | Flavobacteriales        | Flavobacte-<br>riaceae           | Flavobacte-<br>rium                  | ASV1<br>27 | day 14<br>vs. day<br>28 |
| 16.00 | 8.09652 | 2.13043 | 3.80030 | 0.00010.0105 | Verru-<br>comicro-<br>biota | Verru-<br>comicro-<br>biae    | Verrucomicro-<br>biales | Rubri-<br>taleaceae              | Luteolibacter                        | ASV3<br>38 | day 14<br>vs. day<br>28 |
| 13.94 | 8.08615 | 2.33703 | 3.45990 | 0.00050.0316 | Bacteroi-<br>dota           | Bacte-<br>roidia              | Chitinophagales         | Chitinoph-<br>agaceae            | unclassified                         | ASV3<br>85 | day 14<br>vs. day<br>28 |
| 27.63 | 8.07750 | 1.94804 | 1.14643 | 3.38E-0.0030 | Bacteroi-<br>dota           | Bacte-<br>roidia              | Flavobacteriales        | Flavobacte-<br>riaceae           | Flavobacte-<br>rium                  | ASV1<br>82 | day 14<br>vs. day<br>28 |
| 31.50 | 8.04972 | 1.94874 | 1.13063 | 3.62E-0.0032 | Myxo-<br>coccota            | Polyangia                     | Polyangiales            | San-<br>daracinacea<br>e         | unclassified                         | ASV1<br>63 | day 14<br>vs. day<br>28 |
| 20.66 | 8.03823 | 1.92914 | 1.16663 | 3.09E-0.0028 | Bacteroi-<br>dota           | Bacte-<br>roidia              | Chitinophagales         | Chitinoph-<br>agaceae            | Edaphobacu-<br>lum                   | ASV2<br>72 | day 14<br>vs. day<br>28 |
| 31.23 | 8.03375 | 1.74924 | 1.59274 | 4.37E-0.0005 | Proteo-<br>bacteria         | Gammap-<br>roteobac-<br>teria | Pseudomona-<br>dales    | Moraxel-<br>laceae               | unclassified                         | ASV1<br>65 | day 14<br>vs. day<br>28 |
| 22.10 | 8.02042 | 1.75174 | 1.57854 | 4.68E-0.0006 | Actino-<br>bacteri-<br>ota  | Acidimi-<br>crobiia           | Microtrichales          | unclassified                     | unclassified                         | ASV2<br>36 | day 14<br>vs. day<br>28 |
| 21.52 | 8.01069 | 2.14593 | 1.73290 | 0.00010.0133 | Acido-<br>bacteri-<br>ota   | Blastoca-<br>tellia           | Blastocatellales        | Blastoca-<br>tellaceae           | unclassified                         | ASV2<br>50 | day 14<br>vs. day<br>28 |
| 48.47 | 7.98792 | 1.81484 | 1.40151 | 1.08E-0.0011 | Proteo-<br>bacteria         | Alphapro-<br>teobacteria      | Rhizobiales             | Xanthobac-<br>teraceae           | Rhodopseudo-<br>monas                | ASV9<br>8  | day 14<br>vs. day<br>28 |
| 15.72 | 7.93218 | 2.10553 | 1.76730 | 0.00010.0117 | Bacteroi-<br>dota           | Bacte-<br>roidia              | Chitinophagales         | Chitinoph-<br>agaceae            | Ferruginibac-<br>ter                 | ASV3<br>47 | day 14<br>vs. day<br>28 |

|                                      |                             |                               |                       |                             |                         |            |                         |
|--------------------------------------|-----------------------------|-------------------------------|-----------------------|-----------------------------|-------------------------|------------|-------------------------|
| 17.767.929901.75514.51796.24E-0.0007 | Proteo-<br>bacteria         | Alphapro-<br>teobacteria      | Caulobacterales       | Caulobac-<br>teraceae       | Phenylobacte-<br>rium   | ASV3<br>03 | day 14<br>vs. day<br>28 |
| 47.537.924931.72664.58984.43E-0.0005 | Verru-<br>comicro-<br>biota | Verru-<br>comicro-<br>biae    | Opitutales            | Opituta-<br>ceae            | Lacunisphaera           | ASV9<br>7  | day 14<br>vs. day<br>28 |
| 10.657.916522.32553.40420.00060.0373 | Plancto-<br>mycetota        | Plancto-<br>mycetes           | Gemmatales            | Gem-<br>mataceae            | Zavarzinella            | ASV4<br>89 | day 14<br>vs. day<br>28 |
| 14.277.889392.29943.43090.00060.0346 | Bacteroi-<br>dota           | Bacte-<br>roidia              | Cytophagales          | Cytophaga-<br>ceae          | unclassified            | ASV3<br>78 | day 14<br>vs. day<br>28 |
| 19.317.871192.32463.38590.00070.0393 | Proteo-<br>bacteria         | Gammap-<br>roteobac-<br>teria | Legionellales         | Legionel-<br>laceae         | Legionella              | ASV2<br>88 | day 14<br>vs. day<br>28 |
| 104.97.841232.17253.60920.00030.0196 | Proteo-<br>bacteria         | Gammap-<br>roteobac-<br>teria | Xanthomona-<br>dales  | Xan-<br>thomona-<br>daceae  | Thermomonas             | ASV3<br>6  | day 14<br>vs. day<br>28 |
| 23.287.788301.74444.46458.02E-0.0009 | Bacteroi-<br>dota           | Bacte-<br>roidia              | Flavobacteriales      | Flavobacte-<br>riaceae      | Flavobacte-<br>rium     | ASV2<br>24 | day 14<br>vs. day<br>28 |
| 10.967.778082.12633.65780.00020.0167 | Bacteroi-<br>dota           | Bacte-<br>roidia              | Flavobacteriales      | Flavobacte-<br>riaceae      | Flavobacte-<br>rium     | ASV4<br>78 | day 14<br>vs. day<br>28 |
| 15.687.762581.92494.03265.51E-0.0047 | Plancto-<br>mycetota        | Plancto-<br>mycetes           | Pirellulales          | Pirellu-<br>laceae          | unclassified            | ASV3<br>48 | day 14<br>vs. day<br>28 |
| 23.487.747161.75554.41301.02E-0.0011 | Proteo-<br>bacteria         | Alphapro-<br>teobacteria      | Rhodobacterales       | Rhodobac-<br>teraceae       | unclassified            | ASV2<br>20 | day 14<br>vs. day<br>28 |
| 67.307.697191.95343.94028.14E-0.0066 | Verru-<br>comicro-<br>biota | Verru-<br>comicro-<br>biae    | Pedosphaerales        | Pe-<br>dosphaerac-<br>eae   | unclassified            | ASV7<br>0  | day 14<br>vs. day<br>28 |
| 14.987.592082.16023.51430.00040.0269 | Proteo-<br>bacteria         | Alphapro-<br>teobacteria      | Sphingomona-<br>dales | Sphingo-<br>mona-<br>daceae | Altererythro-<br>bacter | ASV3<br>59 | day 14<br>vs. day<br>28 |
| 15.017.567221.76834.27921.88E-0.0019 | Bacteroi-<br>dota           | Bacte-<br>roidia              | Chitinophagales       | Chitinoph-<br>agaceae       | unclassified            | ASV3<br>56 | day 14<br>vs. day<br>28 |
| 33.987.540681.74084.33141.48E-0.0015 | Proteo-<br>bacteria         | Gammap-<br>roteobac-<br>teria | Xanthomona-<br>dales  | Rhodano-<br>bacteraceae     | Rhodanobac-<br>ter      | ASV1<br>51 | day 14<br>vs. day<br>28 |
| 19.077.534501.73914.33211.48E-0.0015 | Acido-<br>bacteri-<br>ota   | Blastoca-<br>tellia           | Blastocatellales      | Blastoca-<br>tellaceae      | unclassified            | ASV2<br>90 | day 14<br>vs. day<br>28 |
| 288.17.499301.61114.65453.25E-0.0004 | Bacteroi-<br>dota           | Bacte-<br>roidia              | Chitinophagales       | Chitinoph-<br>agaceae       | Edaphobacu-<br>lum      | ASV8       | day 14<br>vs. day<br>28 |
| 11.097.499291.93583.87390.00010.0083 | Proteo-<br>bacteria         | Gammap-<br>roteobac-<br>teria | Xanthomona-<br>dales  | Xan-<br>thomona-<br>daceae  | Xanthomonas             | ASV4<br>68 | day 14<br>vs. day<br>28 |

|        |    |          |         |         |              |                   |                     |                    |                     |                  |        |                   |
|--------|----|----------|---------|---------|--------------|-------------------|---------------------|--------------------|---------------------|------------------|--------|-------------------|
| 20.167 | 03 | 7.431141 | 1.77074 | 1.19672 | 2.71E-0.0025 | Verrucomicrobiota | Verrucomicrobiae    | Opitutales         | Opitutaceae         | unclassified     | ASV270 | day 14 vs. day 28 |
| 12.737 | 67 | 7.429021 | 1.79604 | 1.13623 | 3.53E-0.0031 | Verrucomicrobiota | Verrucomicrobiae    | Verrucomicrobiales | Verrucomicrobiaceae | Roseimicrobium   | ASV413 | day 14 vs. day 28 |
| 9.0387 | 16 | 7.400472 | 1.21783 | 3.33670 | 0.00080.0451 | Planctomycetota   | Planctomycetes      | Pirellulales       | Pirellulaceae       | unclassified     | ASV545 | day 14 vs. day 28 |
| 89.137 | 5  | 7.383651 | 1.94463 | 7.79680 | 0.00010.0106 | Bacteroidota      | Bacteroidia         | Sphingobacteriales | Sphingobacteriaceae | Mucilaginibacter | ASV53  | day 14 vs. day 28 |
| 17.537 | 91 | 7.372811 | 1.72934 | 2.26332 | 0.01E-0.0020 | Bdellovibrionota  | Oligoflexia         | 0319-6G20          | unclassified        | unclassified     | ASV309 | day 14 vs. day 28 |
| 20.557 | 83 | 7.352371 | 1.73934 | 2.22712 | 2.37E-0.0023 | Planctomycetota   | Planctomycetes      | Gemmatales         | Gemmataceae         | Gemmata          | ASV260 | day 14 vs. day 28 |
| 41.177 | 9  | 7.350202 | 2.15053 | 3.41780 | 0.00060.0360 | Bacteroidota      | Bacteroidia         | Chitinophagales    | Chitinophagaceae    | unclassified     | ASV118 | day 14 vs. day 28 |
| 28.427 | 7  | 7.321001 | 1.94093 | 7.77190 | 0.00010.0115 | Gemmimonadota     | Gemmatimonadetes    | Gemmatimonadales   | Gemmatimonadaceae   | unclassified     | ASV181 | day 14 vs. day 28 |
| 9.5377 | 83 | 7.286191 | 1.82753 | 3.98696 | 6.69E-0.0056 | Nitrospirota      | Nitrospiria         | Nitrospirales      | Nitrospiraceae      | Nitrospira       | ASV523 | day 14 vs. day 28 |
| 42.157 | 93 | 7.227991 | 1.73124 | 1.17482 | 2.98E-0.0027 | Proteobacteria    | Gammaproteobacteria | Burkholderiales    | Comamonadaceae      | unclassified     | ASV110 | day 14 vs. day 28 |
| 16.517 | 34 | 7.190001 | 1.74534 | 1.11943 | 3.80E-0.0033 | Planctomycetota   | Planctomycetes      | Gemmatales         | Gemmataceae         | Gemmata          | ASV321 | day 14 vs. day 28 |
| 18.187 | 46 | 7.164421 | 1.80423 | 3.97097 | 7.16E-0.0059 | Cyanobacteria     | Vampirivibrionia    | Obscuribacteriales | Obscuribacteraceae  | unclassified     | ASV296 | day 14 vs. day 28 |
| 12.307 | 07 | 7.160171 | 1.95943 | 3.65400 | 0.00020.0169 | Myxococcota       | Polyangia           | Polyangiales       | Polyangiaceae       | Pajaroellobacter | ASV429 | day 14 vs. day 28 |
| 41.177 | 89 | 7.147271 | 1.93583 | 3.69210 | 0.00020.0151 | Proteobacteria    | Gammaproteobacteria | Cellvibrionales    | Cellvibrionaceae    | Cellvibrio       | ASV115 | day 14 vs. day 28 |
| 8.7537 | 41 | 7.111371 | 1.78593 | 3.98186 | 8.4E-0.0056  | Proteobacteria    | Alphaproteobacteria | Dongiales          | Dongiaceae          | Dongia           | ASV549 | day 14 vs. day 28 |
| 7.8147 | 82 | 7.075052 | 2.08323 | 3.39620 | 0.00060.0380 | Bacteroidota      | Bacteroidia         | Cytophagales       | Microscillaceae     | OLB12            | ASV595 | day 14 vs. day 28 |

|        |          |         |         |             |        |                   |                     |                      |                      |                   |        |                   |
|--------|----------|---------|---------|-------------|--------|-------------------|---------------------|----------------------|----------------------|-------------------|--------|-------------------|
| 26.897 | 0.032891 | 1.93063 | 6.64270 | 0.00020     | 0.0175 | Verrucomicrobiota | Verrucomicrobiae    | Pedosphaerales       | Pedospaeraceae       | unclassified      | ASV186 | day 14 vs. day 28 |
| 56.087 | 0.030111 | 1.83623 | 3.82850 | 0.00010     | 0.0097 | Bacteroidota      | Bacteroidia         | Chitinophagales      | Chitinophagaceae     | Aurantisolimonas  | ASV84  | day 14 vs. day 28 |
| 218.16 | 0.997891 | 1.64114 | 2.64020 | 1E-00020    | 0.0020 | Myxococcota       | Polyangia           | Polyangiales         | Sandracinaceae       | unclassified      | ASV11  | day 14 vs. day 28 |
| 12.896 | 0.967721 | 1.77973 | 3.91509 | 0.04E-00072 | 0.0072 | Acidobacteriota   | Acidobacteriae      | unclassified         | unclassified         | unclassified      | ASV415 | day 14 vs. day 28 |
| 82.696 | 0.946991 | 1.93883 | 3.58300 | 0.00030     | 0.0212 | Bacteroidota      | Bacteroidia         | Chitinophagales      | Chitinophagaceae     | Sediminibacterium | ASV54  | day 14 vs. day 28 |
| 7.0916 | 0.868471 | 1.97353 | 3.48010 | 0.00050     | 0.0296 | Bacteroidota      | Bacteroidia         | Sphingobacteriales   | Sphingobacteriaceae  | Solitalea         | ASV632 | day 14 vs. day 28 |
| 18.856 | 0.847771 | 1.94073 | 3.52840 | 0.00040     | 0.0257 | Proteobacteria    | Gammaproteobacteria | Burkholderiales      | Comamonadaceae       | unclassified      | ASV293 | day 14 vs. day 28 |
| 20.276 | 0.777551 | 1.97263 | 3.43580 | 0.00050     | 0.0342 | Proteobacteria    | Gammaproteobacteria | Xanthomonadales      | Rhodanobacteraceae   | Dokdonella        | ASV277 | day 14 vs. day 28 |
| 15.726 | 0.706141 | 1.75623 | 3.81840 | 0.00010     | 0.0100 | Actinobacteriota  | Thermophilophila    | Solirubrobacteriales | Solirubrobacteraceae | Conexibacter      | ASV342 | day 14 vs. day 28 |
| 9.8596 | 0.521401 | 1.94543 | 3.35210 | 0.00080     | 0.0432 | Verrucomicrobiota | Verrucomicrobiae    | Opitutales           | Opitutaceae          | IMCC26134         | ASV518 | day 14 vs. day 28 |
| 11.046 | 0.503441 | 1.78703 | 3.63920 | 0.00020     | 0.0177 | Proteobacteria    | Gammaproteobacteria | Burkholderiales      | Nitrosomonadaceae    | Ellin6067         | ASV461 | day 14 vs. day 28 |
| 14.346 | 0.463181 | 1.93513 | 3.33980 | 0.00080     | 0.0448 | Myxococcota       | Polyangia           | Polyangiales         | Blrii41              | unclassified      | ASV384 | day 14 vs. day 28 |
| 149.96 | 0.343781 | 1.87613 | 3.38130 | 0.00070     | 0.0397 | Bacteroidota      | Bacteroidia         | Flavobacteriales     | Flavobacteriaceae    | Flavobacterium    | ASV22  | day 14 vs. day 28 |
| 12.676 | 0.228511 | 1.78543 | 3.48850 | 0.00040     | 0.0291 | Planctomycetota   | Planctomycetes      | Pirellulales         | Pirellulaceae        | Pirellula         | ASV409 | day 14 vs. day 28 |
| 46.646 | 0.095301 | 1.69733 | 3.59100 | 0.00030     | 0.0208 | Bacteroidota      | Bacteroidia         | Chitinophagales      | Chitinophagaceae     | Chitinophaga      | ASV101 | day 14 vs. day 28 |
| 23.025 | 0.895411 | 1.69273 | 3.48260 | 0.00040     | 0.0295 | Proteobacteria    | Alphaproteobacteria | Reyranellales        | Reyranellaceae       | Reyranella        | ASV229 | day 14 vs. day 28 |
| 167.85 | 0.083861 | 1.50553 | 3.37660 | 0.00070     | 0.0402 | Bacteroidota      | Bacteroidia         | Flavobacteriales     | Flavobacteriaceae    | Flavobacterium    | ASV19  | day 14 vs. day 28 |

|        |         |        |        |              |          |                   |                     |                                     |                       |                 |        |                   |
|--------|---------|--------|--------|--------------|----------|-------------------|---------------------|-------------------------------------|-----------------------|-----------------|--------|-------------------|
| 326.84 | 7.44    | 321.07 | 774.40 | 191.07       | E-0.0011 | Bacteroidia       | Bacteroidia         | Flavobacteriales                    | Flavobacteriaceae     | Flavobacterium  | ASV6   | day 14 vs. day 28 |
| 21     | 0149    | 87249  | 07847  | 05           | 98701    |                   |                     |                                     |                       |                 |        |                   |
| 2.404  | -       | 4.6551 | -      | 4.20E-9.30E- |          | Proteobacteria    | Alphaproteobacteria | Sphingomonadales                    | Sphingomonadaceae     | Novosphingobium | ASV956 | day 14 vs. day 28 |
| 93     | 23.5527 | 48248  | 5.0595 | 07           | 05       |                   |                     |                                     |                       |                 |        |                   |
|        | 233     |        | 0017   |              |          |                   |                     |                                     |                       |                 |        |                   |
| 2.675  | -       | 4.6548 | -      | 3.58E-8.18E- |          | Chloroflexi       | Chloroflexia        | Chloroflexales                      | Chloroflexaceae       | FFCH7168        | ASV886 | day 14 vs. day 28 |
| 49     | 23.6943 | 8063   | 5.0902 | 07           | 05       |                   |                     |                                     |                       |                 |        |                   |
|        | 197     |        | 0995   |              |          |                   |                     |                                     |                       |                 |        |                   |
| 4.268  | -       | 4.6539 | -      | 1.59E-4.20E- |          | Verrucomicrobiota | Verrucomicrobiae    | Verrucomicrobiales                  | Rubritaleaceae        | Luteolibacter   | ASV668 | day 14 vs. day 28 |
| 75     | 24.3973 | 92961  | 5.2422 | 07           | 05       |                   |                     |                                     |                       |                 |        |                   |
|        | 041     |        | 3056   |              |          |                   |                     |                                     |                       |                 |        |                   |
| 3.066  | -       | 4.6545 | -      | 3.53E-1.16E- |          | Bacteroidia       | Bacteroidia         | Cytophagales                        | Spirosomaceae         | Leadbetterella  | ASV803 | day 14 vs. day 28 |
| 29     | 25.6598 | 78157  | 5.5128 | 08           | 05       |                   |                     |                                     |                       |                 |        |                   |
|        | 265     |        | 1462   |              |          |                   |                     |                                     |                       |                 |        |                   |
| 5.020  | -       | 4.6537 | -      | 2.14E-7.80E- |          | Bacteroidia       | Bacteroidia         | Flavobacteriales                    | Flavobacteriaceae     | Flavobacterium  | ASV605 | day 14 vs. day 28 |
| 3      | 26.0631 | 69776  | 5.6004 | 08           | 06       |                   |                     |                                     |                       |                 |        |                   |
|        | 614     |        | 4064   |              |          |                   |                     |                                     |                       |                 |        |                   |
| 11.66  | -       | 4.6530 | -      | 4.11E-2.31E- |          | Bacteroidia       | Bacteroidia         | Flavobacteriales                    | Crocinitomicaceae     | unclassified    | ASV304 | day 14 vs. day 28 |
| 39     | 27.3592 | 47027  | 5.8798 | 09           | 06       |                   |                     |                                     |                       |                 |        |                   |
|        | 887     |        | 6508   |              |          |                   |                     |                                     |                       |                 |        |                   |
| 26.39  | 8.37688 | 2.3226 | 3.6066 | 0.0003       | 0.0197   | Bacteroidia       | Bacteroidia         | Cytophagales                        | Cytophagaceae         | Cytophaga       | ASV196 | day 28 vs. day 42 |
| 32     | 4199    | 12422  | 64685  | 10158        | 38926    |                   |                     |                                     |                       |                 |        |                   |
| 23.98  | 8.22143 | 2.2947 | 3.5827 | 0.0003       | 0.0212   | Verrucomicrobiota | Verrucomicrobiae    | Pedospaerales                       | Pedospaeraceae        | unclassified    | ASV213 | day 28 vs. day 42 |
| 16     | 9751    | 26605  | 53489  | 39991        | 36872    |                   |                     |                                     |                       |                 |        |                   |
| 14.01  | 7.88705 | 2.3396 | 3.3709 | 0.0007       | 0.0409   | Bacteroidia       | Bacteroidia         | Cytophagales                        | Cytophagaceae         | Cytophaga       | ASV381 | day 28 vs. day 42 |
| 21     | 3358    | 98596  | 69822  | 49041        | 15207    |                   |                     |                                     |                       |                 |        |                   |
| 32.50  | -       | 2.3350 | -      | 0.0005       | 0.0323   | Bacteroidia       | Bacteroidia         | Cytophagales                        | Spirosomaceae         | Leadbetterella  | ASV104 | day 28 vs. day 42 |
| 75     | 8.06375 | 00045  | 3.4534 | 53507        | 2866     |                   |                     |                                     |                       |                 |        |                   |
|        | 764     |        | 2933   |              |          |                   |                     |                                     |                       |                 |        |                   |
| 11.12  | -       | 4.5739 | -      | 6.47E-0.0054 |          | Firmicutes        | Clostridia          | Peptostreptococcales-Tissierellales | Peptostreptococcaceae | Romboutsia      | ASV366 | day 28 vs. day 42 |
| 28     | 18.2733 | 22374  | 3.9951 | 05           | 52597    |                   |                     |                                     |                       |                 |        |                   |
|        | 655     |        | 193    |              |          |                   |                     |                                     |                       |                 |        |                   |
| 8.919  | -       | 4.5597 | -      | 4.99E-2.59E- |          | Myxococcota       | Myxococcia          | Myxococcales                        | Myxococcaceae         | Corallococcus   | ASV392 | day 28 vs. day 42 |
| 8      | 26.6631 | 94817  | 5.8474 | 09           | 06       |                   |                     |                                     |                       |                 |        |                   |
|        | 158     |        | 3762   |              |          |                   |                     |                                     |                       |                 |        |                   |
| 25.71  | -       | 4.6635 | -      | 6.62E-7.44E- |          | Bacteroidia       | Bacteroidia         | Flavobacteriales                    | Weekselaceae          | Elizabethkingia | ASV234 | day 28 vs. day 42 |
| 65     | 30.4485 | 88818  | 6.5289 | 11           | 08       |                   |                     |                                     |                       |                 |        |                   |
|        | 332     |        | 9181   |              |          |                   |                     |                                     |                       |                 |        |                   |
| 22.63  | 37.3296 | 3.2713 | 11.411 | 3.68E-1.66E- |          | Verrucomicrobiota | Verrucomicrobiae    | Verrucomicrobiales                  | Rubritaleaceae        | Luteolibacter   | ASV159 | day 42 vs. day 56 |
| 31     | 0719    | 6166   | 03035  | 30           | 26       |                   |                     |                                     |                       |                 |        |                   |
| 27.98  | 8.22948 | 2.3010 | 3.5764 | 0.0003       | 0.0216   | Bacteroidia       | Bacteroidia         | Flavobacteriales                    | Flavobacteriaceae     | Flavobacterium  | ASV192 | day 42 vs. day 56 |
| 62     | 921     | 21042  | 51088  | 4829         | 54999    |                   |                     |                                     |                       |                 |        |                   |
| 22.30  | 8.08435 | 2.3215 | 3.4822 | 0.0004       | 0.0295   | Bacteroidia       | Bacteroidia         | Flavobacteriales                    | Flavobacteriaceae     | Flavobacterium  | ASV247 | day 42 vs. day 56 |
| 27     | 1785    | 82045  | 59781  | 97201        | 51705    |                   |                     |                                     |                       |                 |        |                   |



|       |         |         |         |         |        |                   |                     |                    |                     |                 |        |                   |
|-------|---------|---------|---------|---------|--------|-------------------|---------------------|--------------------|---------------------|-----------------|--------|-------------------|
| 24.16 | 8.07560 | 2.30133 | 5.50900 | 0.00040 | 0.0273 | Verrucomicrobiota | Verrucomicrobiae    | Verrucomicrobiales | Rubritaleaceae      | Luteolibacter   | ASV21  | day 42 vs. day 56 |
| 55    | 296     | 43724   | 81619   | 49657   | 27796  |                   |                     |                    |                     |                 |        |                   |
| 14.97 | 7.99269 | 2.30723 | 4.46410 | 0.00050 | 0.0313 | Verrucomicrobiota | Verrucomicrobiae    | Chthoniobacterales | Chthoniobacteraceae | Chthoniobacter  | ASV370 | day 42 vs. day 56 |
| 25    | 0711    | 65091   | 40616   | 31928   | 3964   |                   |                     |                    |                     |                 |        |                   |
| 35.54 | 7.94159 | 1.74534 | 5.55015 | 5.36E-0 | 0.0006 | Proteobacteria    | Gammaproteobacteria | Xanthomonadales    | unclassified        | unclassified    | ASV108 | day 42 vs. day 56 |
| 37    | 5092    | 49978   | 4478    | 06      | 75975  |                   |                     |                    |                     |                 |        |                   |
| 57.81 | 7.83050 | 1.80114 | 4.34751 | 1.38E-0 | 0.0014 | Bacteroidota      | Bacteroidia         | Chitinophagales    | Chitinophagaceae    | Ferruginibacter | ASV60  | day 42 vs. day 56 |
| 03    | 6589    | 42571   | 21798   | 05      | 98095  |                   |                     |                    |                     |                 |        |                   |
| 30.11 | 7.71650 | 2.30553 | 3.34680 | 0.00080 | 0.0439 | Verrucomicrobiota | Verrucomicrobiae    | Verrucomicrobiales | Rubritaleaceae      | unclassified    | ASV171 | day 42 vs. day 56 |
| 47    | 8286    | 84799   | 76805   | 17275   | 30985  |                   |                     |                    |                     |                 |        |                   |
| 20.84 | 7.65509 | 2.13193 | 5.59050 | 0.00030 | 0.0208 | Bacteroidota      | Bacteroidia         | Sphingobacteriales | Sphingobacteriaceae | Pedobacter      | ASV204 | day 42 vs. day 56 |
| 28    | 0075    | 84966   | 92897   | 29927   | 00794  |                   |                     |                    |                     |                 |        |                   |
| 26.80 | 6.81646 | 1.93873 | 5.51590 | 0.00040 | 0.0268 | Bacteroidota      | Bacteroidia         | Sphingobacteriales | Sphingobacteriaceae | Pedobacter      | ASV161 | day 42 vs. day 56 |
| 03    | 8745    | 15716   | 71263   | 38148   | 70447  |                   |                     |                    |                     |                 |        |                   |
| 12.63 | 6.59296 | 1.77233 | 7.71980 | 0.00010 | 0.0139 | Proteobacteria    | Alphaproteobacteria | Rhizobiales        | Rhizobiaceae        | Neorhizobium    | ASV358 | day 42 vs. day 56 |
| 92    | 0096    | 90764   | 11811   | 99371   | 335    |                   |                     |                    |                     |                 |        |                   |
| 18.07 | 6.43503 | 1.75883 | 6.65870 | 0.00020 | 0.0167 | Bacteroidota      | Bacteroidia         | Chitinophagales    | Chitinophagaceae    | Niabella        | ASV216 | day 42 vs. day 56 |
| 91    | 4498    | 17317   | 28191   | 5347    | 3773   |                   |                     |                    |                     |                 |        |                   |
| 13.39 | -       | 4.2600  | -       | 2.33E-0 | 0.0003 | Bacteroidota      | Bacteroidia         | Chitinophagales    | Chitinophagaceae    | unclassified    | ASV412 | day 42 vs. day 56 |
| 37    | 20.1187 | 51322   | 4.7226  | 5509    | 06     | 72518             |                     |                    |                     |                 |        |                   |
| 25.71 | -       | 4.6529  | -       | 3.83E-1 | 2.29E- | Bacteroidota      | Bacteroidia         | Flavobacteriales   | Weekseliaceae       | Elizabethkingia | ASV234 | day 42 vs. day 56 |
| 65    | 35.2069 | 7.5666  | 7076    | 14      | 10     |                   |                     |                    |                     |                 |        |                   |
